# Supplementary material for: Homology blocks of Plasmodium falciparum var genes and clinically distinct forms of severe malaria in a local population
Source: PubMed Central journal article supplement (PMC3827005; doi:10.1186/1471-2180-13-244), 2013-11-06
Supplement: 1471-2180-13-244-S3.pdf [file 1471-2180-13-244-S3.pdf]

## Supplementary tables

**Table SI. Multiple regression models of rosetting that include an HB expression rate as an independent variable\***

| Independent Variables          | AIC     | BIC     | R <sup>2</sup> | Adjusted R <sup>2</sup> |
|--------------------------------|---------|---------|----------------|-------------------------|
| Age,AL,C2,G1,G2,G3,B1C6,H3     | 21.9684 | 50.7204 | 0.387784       | 0.347639                |
| Age,AL,C2,G1,G2,G3,B1C6,H3,5   | 23.9512 | 55.5784 | 0.387865       | 0.342334                |
| Age,AL,C2,G1,G2,G3,B1C6,H3,14  | 22.843  | 54.4702 | 0.393021       | 0.347874                |
| Age,AL,C2,G1,G2,G3,B1C6,H3,36  | 23.4921 | 55.1192 | 0.390006       | 0.344635                |
| Age,AL,C2,G1,G2,G3,B1C6,H3,54  | 19.0223 | 50.6495 | 0.410469       | 0.366619                |
| Age,AL,C2,G1,G2,G3,B1C6,H3,60  | 23.4298 | 55.057  | 0.390296       | 0.344946                |
| Age,AL,C2,G1,G2,G3,B1C6,H3,64  | 23.5873 | 55.2145 | 0.389563       | 0.344158                |
| Age,AL,C2,G1,G2,G3,B1C6,H3,79  | 23.7366 | 55.3638 | 0.388867       | 0.34341                 |
| Age,AL,C2,G1,G2,G3,B1C6,H3,88  | 23.7337 | 55.3608 | 0.38888        | 0.343425                |
| Age,AL,C2,G1,G2,G3,B1C6,H3,131 | 23.4345 | 55.0617 | 0.390274       | 0.344923                |
| Age,AL,C2,G1,G2,G3,B1C6,H3,153 | 23.4217 | 55.0488 | 0.390334       | 0.344987                |
| Age,AL,C2,G1,G2,G3,B1C6,H3,161 | 23.859  | 55.4862 | 0.388295       | 0.342797                |
| Age,AL,C2,G1,G2,G3,B1C6,H3,163 | 23.8943 | 55.5215 | 0.388131       | 0.34262                 |
| Age,AL,C2,G1,G2,G3,B1C6,H3,171 | 22.0522 | 53.6793 | 0.396675       | 0.351799                |
| Age,AL,C2,G1,G2,G3,B1C6,H3,179 | 22.6246 | 54.2517 | 0.394033       | 0.348961                |
| Age,AL,C2,G1,G2,G3,B1C6,H3,204 | 16.9953 | 48.6225 | 0.41952        | 0.376344                |
| Age,AL,C2,G1,G2,G3,B1C6,H3,210 | 21.9282 | 53.5553 | 0.397245       | 0.352412                |
| Age,AL,C2,G1,G2,G3,B1C6,H3,219 | 22.5738 | 54.201  | 0.394267       | 0.349213                |
| Age,AL,C2,G1,G2,G3,B1C6,H3,248 | 23.928  | 55.5552 | 0.387973       | 0.34245                 |
| Age,AL,C2,G1,G2,G3,B1C6,H3,260 | 23.699  | 55.3262 | 0.389042       | 0.343599                |
| Age,AL,C2,G1,G2,G3,B1C6,H3,345 | 22.3893 | 54.0164 | 0.39512        | 0.350129                |
| Age,AL,C2,G1,G2,G3,B1C6,H3,367 | 23.5754 | 55.2026 | 0.389618       | 0.344218                |
| Age,AL,C2,G1,G2,G3,B1C6,H3,386 | 23.4898 | 55.117  | 0.390017       | 0.344646                |
| Age,AL,C2,G1,G2,G3,B1C6,H3,402 | 23.8821 | 55.5092 | 0.388188       | 0.342681                |
| Age,AL,C2,G1,G2,G3,B1C6,H3,446 | 23.1223 | 54.7495 | 0.391726       | 0.346482                |
| Age,AL,C2,G1,G2,G3,B1C6,H3,486 | 23.5557 | 55.1828 | 0.38971        | 0.344317                |
| Age,AL,C2,G1,G2,G3,B1C6,H3,493 | 22.8114 | 54.4386 | 0.393168       | 0.348031                |
| Age,AL,C2,G1,G2,G3,B1C6,H3,524 | 23.7102 | 55.3374 | 0.38899        | 0.343543                |
| Age,AL,C2,G1,G2,G3,B1C6,H3,556 | 23.2254 | 54.8525 | 0.391247       | 0.345968                |
| Age,AL,C2,G1,G2,G3,B1C6,H3,590 | 23.2902 | 54.9174 | 0.390946       | 0.345644                |

\*Highlighted cases are those where the model improves with the addition of an HB expression rate.

AL=group A-like, C2=cys-2, G1=cysPoLV group 1, G2=cysPoLV group 2, G3=cysPoLV group 3,  
B1C6=BS1/CP6, H3=h3sub.

**Table SII. Multiple regression models of rosetting that include an HB expression PC as an independent variable\***

| Independent Variables           | AIC     | BIC     | R <sup>2</sup> | Adjusted R <sup>2</sup> |
|---------------------------------|---------|---------|----------------|-------------------------|
| Age,AL,C2,G1,G2,G3,B1C6,H3      | 21.9684 | 50.7204 | 0.387784       | 0.347639                |
| Age,AL,C2,G1,G2,G3,B1C6,H3,PC1  | 22.4941 | 54.1213 | 0.394636       | 0.349609                |
| Age,AL,C2,G1,G2,G3,B1C6,H3,PC2  | 23.921  | 55.5481 | 0.388006       | 0.342486                |
| Age,AL,C2,G1,G2,G3,B1C6,H3,PC3  | 16.7279 | 48.3551 | 0.420704       | 0.377616                |
| Age,AL,C2,G1,G2,G3,B1C6,H3,PC4  | 23.1699 | 54.7971 | 0.391505       | 0.346245                |
| Age,AL,C2,G1,G2,G3,B1C6,H3,PC5  | 23.2716 | 54.8988 | 0.391032       | 0.345737                |
| Age,AL,C2,G1,G2,G3,B1C6,H3,PC6  | 23.9621 | 55.5893 | 0.387814       | 0.342279                |
| Age,AL,C2,G1,G2,G3,B1C6,H3,PC7  | 23.9475 | 55.5747 | 0.387882       | 0.342353                |
| Age,AL,C2,G1,G2,G3,B1C6,H3,PC8  | 23.939  | 55.5661 | 0.387922       | 0.342396                |
| Age,AL,C2,G1,G2,G3,B1C6,H3,PC9  | 23.9396 | 55.5668 | 0.387919       | 0.342392                |
| Age,AL,C2,G1,G2,G3,B1C6,H3,PC10 | 23.9464 | 55.5736 | 0.387887       | 0.342358                |
| Age,AL,C2,G1,G2,G3,B1C6,H3,PC11 | 23.8382 | 55.4653 | 0.388393       | 0.342901                |
| Age,AL,C2,G1,G2,G3,B1C6,H3,PC12 | 21.325  | 52.9522 | 0.400014       | 0.355387                |
| Age,AL,C2,G1,G2,G3,B1C6,H3,PC13 | 23.3138 | 54.941  | 0.390836       | 0.345526                |
| Age,AL,C2,G1,G2,G3,B1C6,H3,PC14 | 22.3988 | 54.026  | 0.395076       | 0.350082                |
| Age,AL,C2,G1,G2,G3,B1C6,H3,PC15 | 23.2751 | 54.9022 | 0.391016       | 0.34572                 |
| Age,AL,C2,G1,G2,G3,B1C6,H3,PC16 | 23.8542 | 55.4813 | 0.388318       | 0.342821                |
| Age,AL,C2,G1,G2,G3,B1C6,H3,PC17 | 23.5312 | 55.1584 | 0.389824       | 0.344439                |
| Age,AL,C2,G1,G2,G3,B1C6,H3,PC18 | 23.9418 | 55.569  | 0.387909       | 0.342381                |
| Age,AL,C2,G1,G2,G3,B1C6,H3,PC19 | 23.8015 | 55.4287 | 0.388564       | 0.343085                |
| Age,AL,C2,G1,G2,G3,B1C6,H3,PC20 | 21.0748 | 52.7019 | 0.401159       | 0.356617                |
| Age,AL,C2,G1,G2,G3,B1C6,H3,PC21 | 23.1689 | 54.796  | 0.39151        | 0.34625                 |
| Age,AL,C2,G1,G2,G3,B1C6,H3,PC22 | 20.7867 | 52.4139 | 0.402475       | 0.358031                |
| Age,AL,C2,G1,G2,G3,B1C6,H3,PC23 | 22.5104 | 54.1375 | 0.394561       | 0.349528                |
| Age,AL,C2,G1,G2,G3,B1C6,H3,PC24 | 23.1642 | 54.7914 | 0.391531       | 0.346273                |
| Age,AL,C2,G1,G2,G3,B1C6,H3,PC25 | 23.9579 | 55.585  | 0.387834       | 0.342301                |
| Age,AL,C2,G1,G2,G3,B1C6,H3,PC26 | 23.5258 | 55.153  | 0.389849       | 0.344466                |
| Age,AL,C2,G1,G2,G3,B1C6,H3,PC27 | 23.8281 | 55.4553 | 0.38844        | 0.342952                |
| Age,AL,C2,G1,G2,G3,B1C6,H3,PC28 | 21.7344 | 53.3616 | 0.398136       | 0.353369                |
| Age,AL,C2,G1,G2,G3,B1C6,H3,PC29 | 22.9089 | 54.536  | 0.392716       | 0.347546                |

\*Highlighted case is one where the model improves with the addition of a PC.

AL=group A-like, C2=cys-2, G1=cysPoLV group 1, G2=cysPoLV group 2, G3=cysPoLV group 3, B1C6=BS1/CP6, H3=h3sub

**Table SIII. Statistics for multiple regression models predicting rosetting with and without age\***

|   | Independent variables                  | AIC   | BIC   | R <sup>2</sup> | Adj. R <sup>2</sup> |
|---|----------------------------------------|-------|-------|----------------|---------------------|
| A | Age,Cys2,Grp1,Grp2,Grp3,BS1CP6         | 20.97 | 41.09 | 0.364          | 0.339               |
|   | Cys2,Grp1,Grp2,Grp3,BS1CP6             | 20.14 | 37.40 | 0.358          | 0.338               |
| B | Age, HB36, HB204, HB210, HB219, HB486  | 18.46 | 41.46 | 0.385          | 0.356               |
|   | HB36, HB204, HB210, HB219, HB486       | 16.48 | 36.60 | 0.385          | 0.361               |
| C | Age, BS1CP6, HB54, HB171, HB204, HB219 | 14.34 | 37.34 | 0.405          | 0.376               |
|   | BS1CP6, HB54, HB171, HB204, HB219      | 16.82 | 34.07 | 0.374          | 0.354               |
| D | Age, BS1CP6, PC1, PC3, PC4, PC22       | 6.505 | 29.51 | 0.439          | 0.412               |
|   | BS1CP6, PC1, PC3, PC4, PC22            | 4.776 | 24.90 | 0.438          | 0.415               |

\*The result of removing the least significant genetic variable, one by one, from models of rosetting that start with the expression rates of: (row A) the 7 classic *var* types, (row B) the 29 HB expression rates, (row C) the expression rates for both the 7 classic *var* types and the 29 HBs, and (row D) the expression rates for the 7 classic *var* types and the 29 HB expression rate PCs. The variable selection procedure is done maintaining host age in the model, however statistics are shown for the optimal model with age (green rows) and after removing age (white rows).
